# Supplementary material for: Targeting oncogenic KRAS in non-small cell lung cancer with EGFR aptamer-conjugated multifunctional RNA nanoparticles
Source: PubMed Central journal article supplement — Mol Ther Nucleic Acids. 2023 Jul 28;33:559–71. doi: 10.1016/j.omtn.2023.07.027 (PMC10448464; doi:10.1016/j.omtn.2023.07.027), 2023-07-28
Supplement: mmc1.pdf [file mmc1.pdf]

OMTN, Volume 33

## Supplemental information

**Targeting oncogenic *KRAS* in non-small cell lung cancer with EGFR aptamer-conjugated multifunctional RNA nanoparticles**

**Linlin Yang, Zhefeng Li, Daniel W. Binzel, Peixuan Guo, and Terence M. Williams**

**Table S1: Sequences used for construction of 3WJ pRNA nanoparticles.**

| ID                                  | sequence                                                                              |
|-------------------------------------|---------------------------------------------------------------------------------------|
| a: KRASG12C siRNA sense strand      | 5'-uuG ccA uGu GuA uGu GGG Guu GGa Gcu uGu GGc GuA Guu-3'                             |
| a': Scramble siRNA sense strand     | 5'-uuG ccA uGu GuA uGu GGG GGu cGA cGu ccA uuA ucu uuu-3'                             |
| b: EGFR aptamer strand              | 5'-ccc AcA uAc uuu Guu GAu ccG ccu uAG uAA cGu Gcu uuG AuG ucG Auu cGA cAG GAG Gc-3'  |
| b': Scramble aptamer strand         | 5'-ccc AcA uAc uuu Guu GAu ccu ucG uAc cGG GuA GGU uGG cuu GcA cAu AGA AcG uGu ucA-3' |
| c: Strand without Alexa647          | 5'-GGA ucA Auc AuG GcA A-3'                                                           |
| c': strand for Alexa647 conjugation | 5'-GGA ucA Auc AuG GcA A (C6-NH)(Alexa 647)-3'                                        |
| d: KRASG12C siRNA antisense strand  | 5'-cuA cGc cAc AAG cuc cAA-3'                                                         |
| d': Scramble siRNA antisense strand | 5'-AAG AuA AuG GAc Guc GAc c-3'                                                       |

The lower letters indicated 2'-Fluoro modified nucleotides.

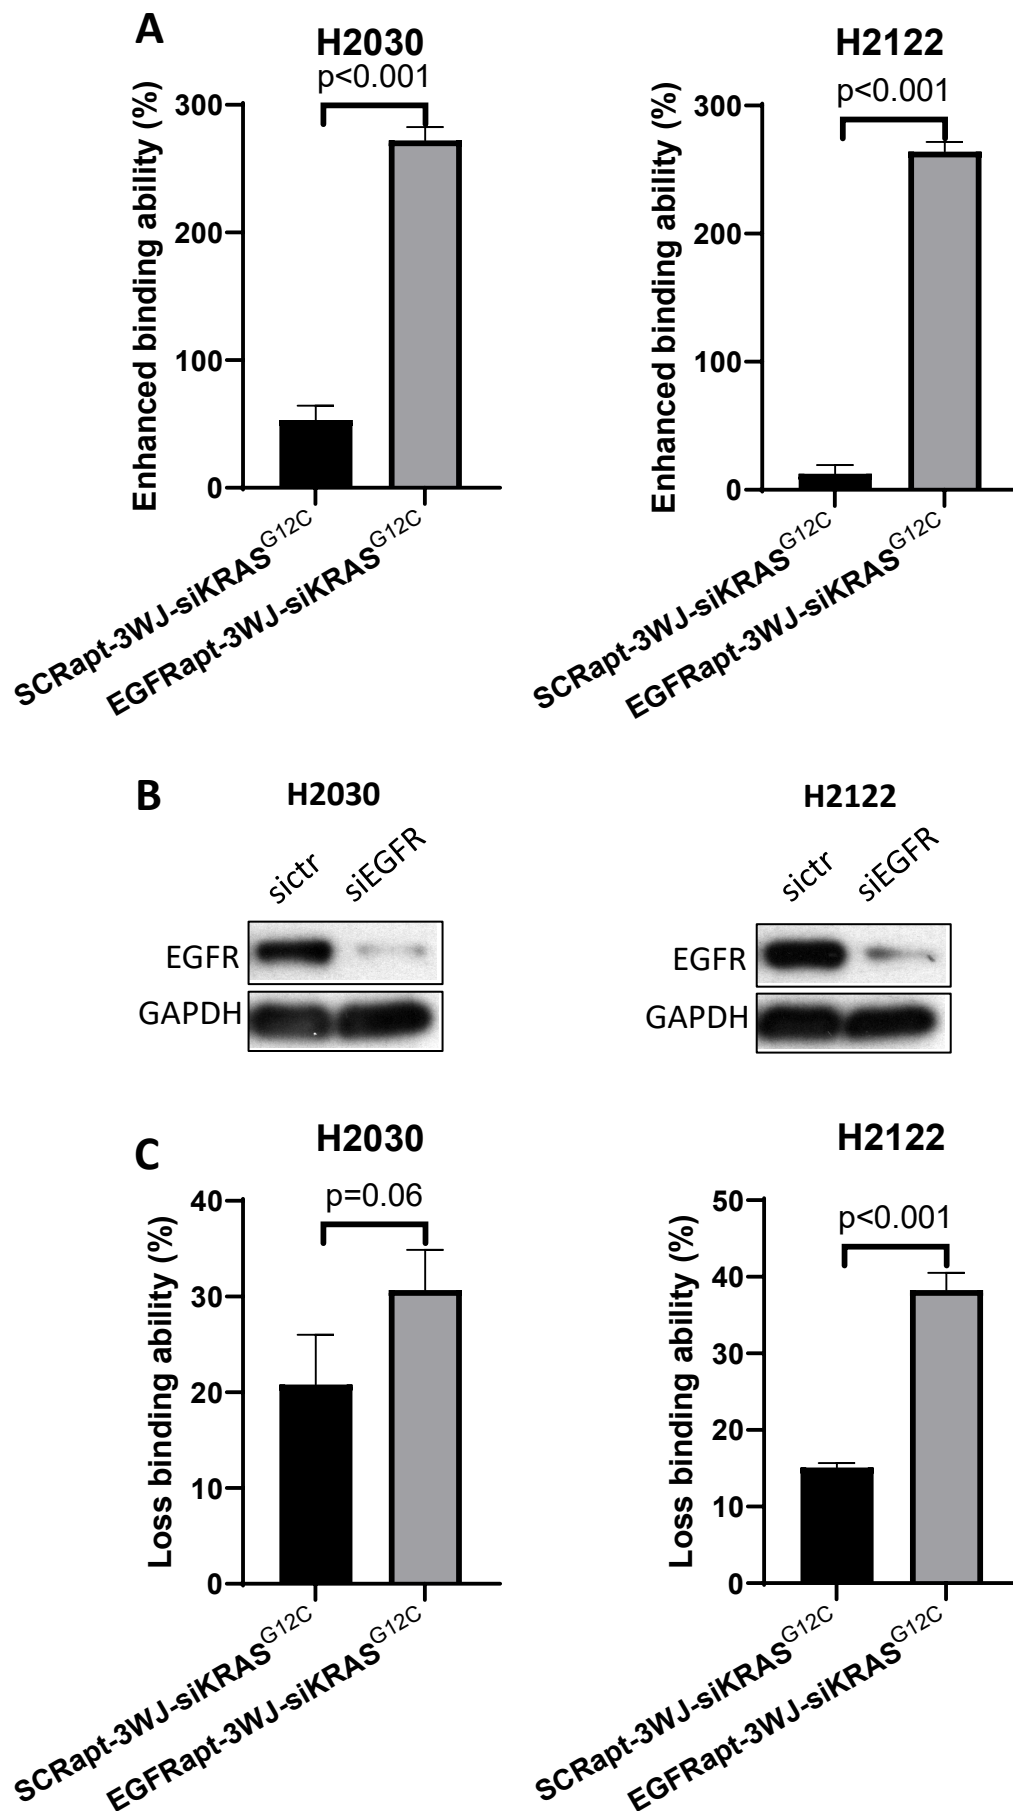

**Figure S1. EGFR aptamer increased pRNA nanoparticle binding ability to NSCLC cells. A.** Enhanced pRNA binding ability (%) by EGFR aptamer compared to non-aptamer pRNA nanoparticles (SCRapt). **B.** Immunoblotting confirms EGFR silencing by EGFR siRNA. **C.** Reduction in binding ability (%) of pRNA nanoparticles after EGFR silencing in NSCLC cells compared to non-targeting siRNA control cells (sictr).

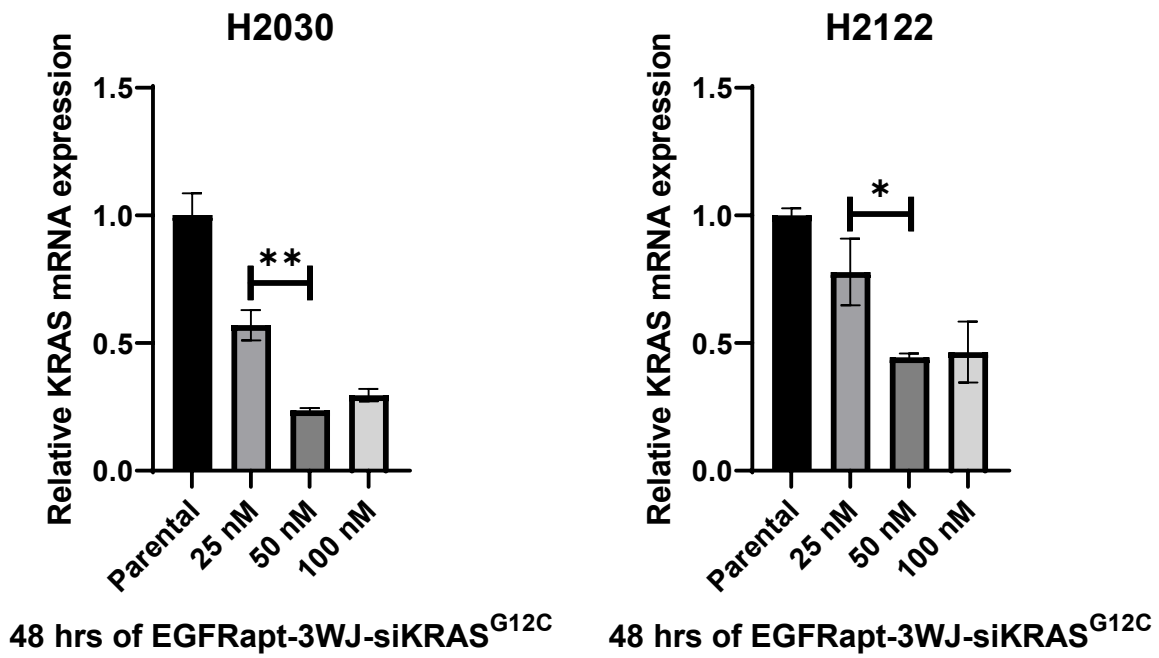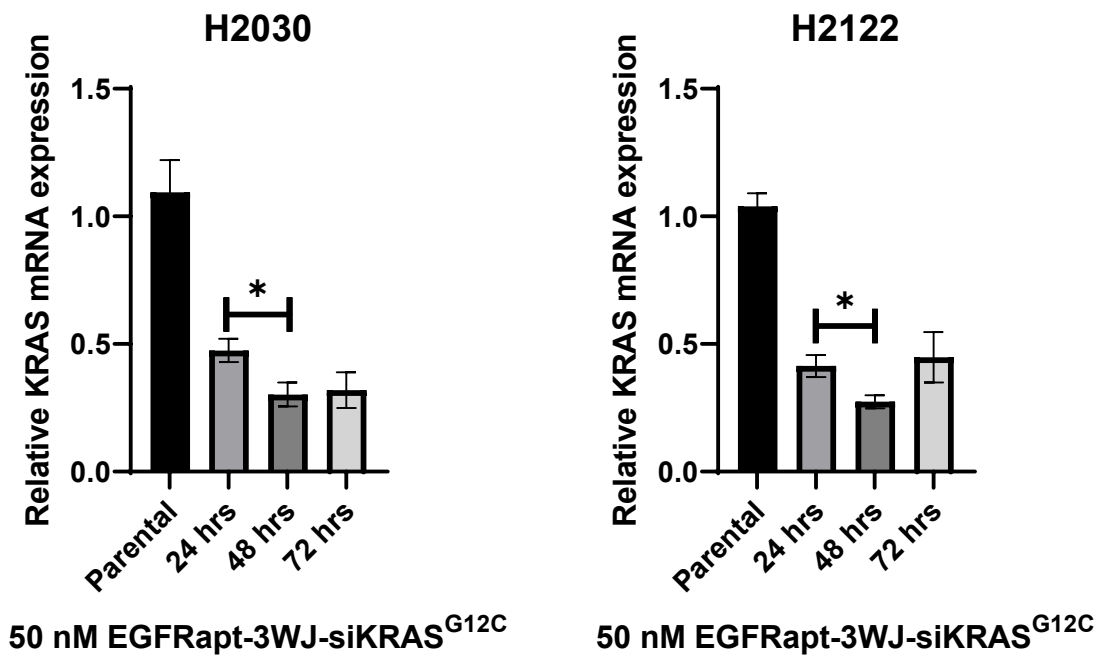

**Figure S2.** Dose and time course suppression of KRAS mRNA by EGFRapt-3WJ-siKRAS<sup>G12C</sup> nanoparticles

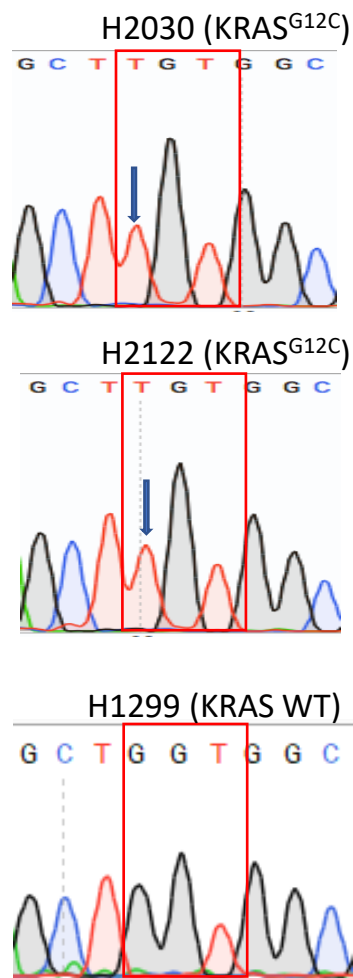

**Figure S3.** Sanger sequencing confirms the presence of KRAS<sup>G12C</sup> mutations in H2030 and H2122 cells, and wild-type KRAS in H1299 cells.

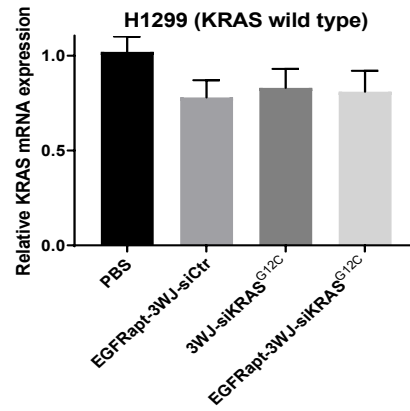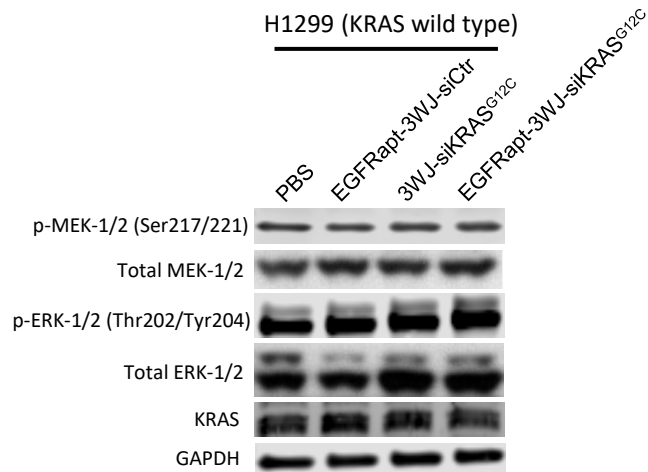

**Figure S4.** KRAS wild type NSCLC is not a target of EGFR<sub>apt</sub>-3WJ-siKRAS<sup>G12C</sup> pRNA nanoparticles

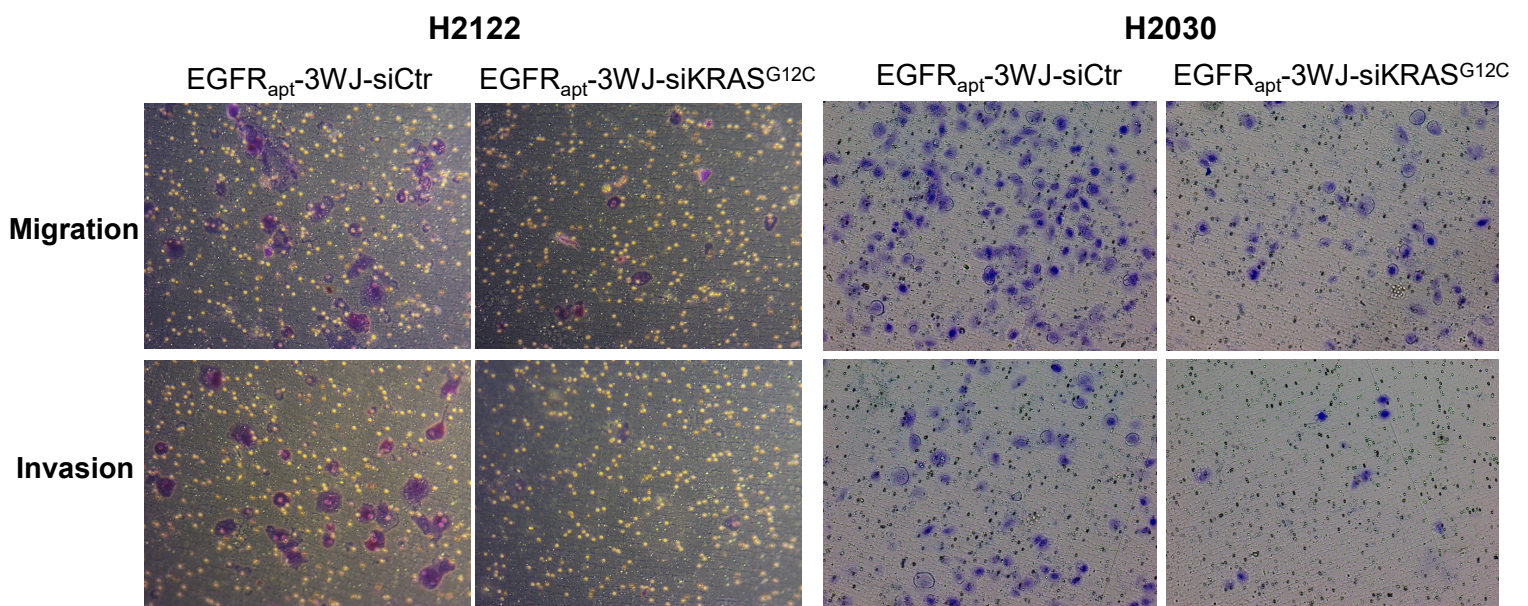

**Figure S5.** Representative pictures of migration and invasion assays in H2030 and H2122 cells.

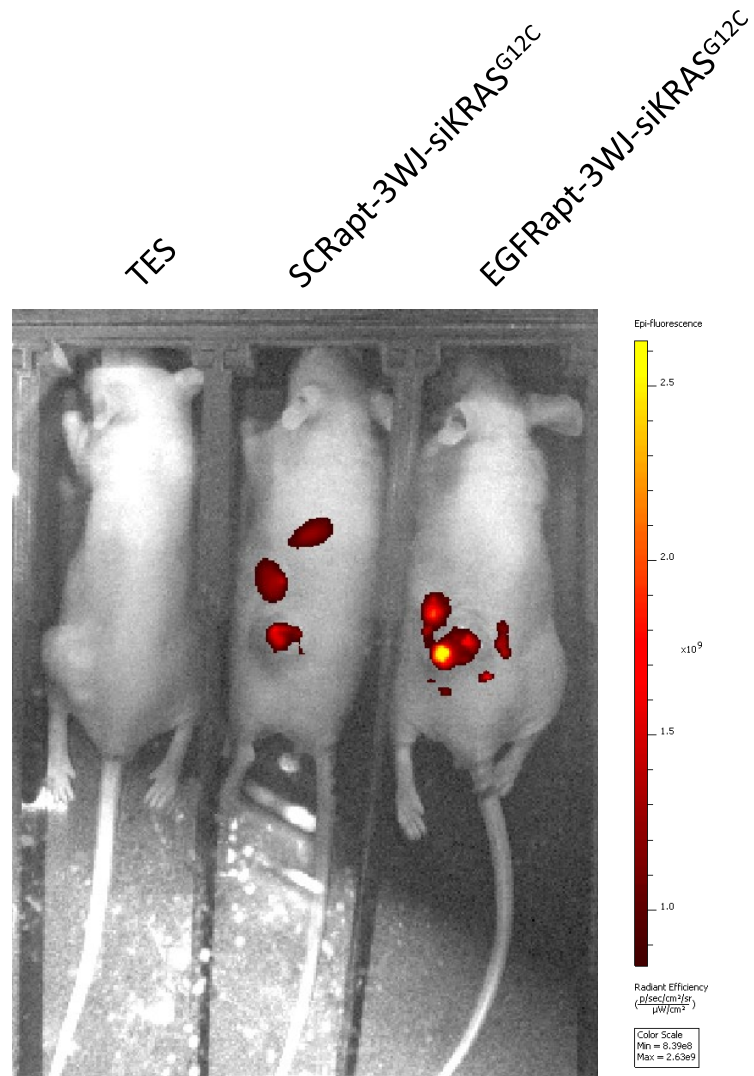

**Figure S6.** *In vivo* biodistribution of EGFRapt-3WJ-siKRAS<sup>G12C</sup> and SCRapt-3WJ-siKRAS<sup>G12C</sup> in H2122 tumor xenografts.
